# Supplementary material for: Birth Defects in Gaza: Prevalence, Types, Familiarity and Correlation with Environmental Factors
Source: MDPI journal article supplement (doi:10.3390/ijerph9051732), 2012-05-07
Supplement: s1 [file s1]

Supplementary Table III

## Miscarriages past 16 weeks and before 28 weeks

| Interviewer file number | date of birth             | child sex | alive at birth | parents relationship                 | previous miscarriages | previous BD                        | BD                                          |
|-------------------------|---------------------------|-----------|----------------|--------------------------------------|-----------------------|------------------------------------|---------------------------------------------|
| E173                    | 23-08-11                  | F         | N              | na                                   | N                     | N                                  |                                             |
| E174                    | 23-08-11                  | M         | N              | na                                   | N                     | N                                  |                                             |
| E21                     | 07-08-11                  | M         | N              | 3                                    | N                     | N                                  |                                             |
| E229                    | 08-09-11                  | F         | N              | 3                                    | N                     | N                                  | Y 084 Strain atrophy                        |
| E237                    | 08-09-11                  | F         | N              | 3                                    | N                     | N                                  |                                             |
| E275                    | 07-09-11                  | na        | N              | 1                                    | Y                     | N                                  |                                             |
| E319                    | 13-09-11                  | F         | N              | 1                                    | Y                     | N                                  |                                             |
| E380                    | 18-09-11                  | M         | N              | 3                                    | N                     | N                                  |                                             |
| E393                    | 20-09-11                  | F         | N              | 3                                    | N                     | N                                  |                                             |
| E401                    | 20-09-11                  | F         | N              | 1                                    | Y                     | N                                  |                                             |
| E405                    | 21-09-11                  | F         | N              | 1                                    | N                     | N                                  |                                             |
| E451                    | 25-09-11                  | F         | N              | 3                                    | N                     | N                                  |                                             |
| E57                     | 11-08-11                  | M         | N              | 1                                    | N                     | N                                  |                                             |
| E96                     | 15-08-11                  | M         | N              | 1                                    | Y                     | N                                  |                                             |
| E214                    | 21-05-11                  | M         | N              | na                                   | na                    | N                                  |                                             |
| E234                    | 03-06-11                  | F         | N              | 1                                    | N                     | N                                  |                                             |
| E269                    | 06-06-11                  | M         | N              | 1                                    | Y                     | N                                  |                                             |
| E291                    | 09-06-11                  | M         | N              | 3                                    | N                     | N                                  |                                             |
| E374                    | 09-07-11                  | F         | N              | 1                                    | N                     | N                                  |                                             |
| E378                    | 10-07-11                  | M         | N              | 3                                    | N                     | N                                  |                                             |
| E385                    | 13-07-11                  | M         | N              | 1                                    | N                     | N                                  |                                             |
| E416                    | 16-07-11                  | M         | N              | 1                                    | N                     | N                                  |                                             |
| E462                    | 24-07-11                  | F         | N              | 3                                    | N                     | N                                  |                                             |
| H1001                   | 10-08-11                  | M         | N              | 1                                    | Y                     | N                                  |                                             |
| H1025                   | 13-08-11                  | M         | Y              | 3                                    | Y                     | N                                  |                                             |
| H1032                   | 13-08-11                  | F         | Y              | 1                                    | Y                     | N                                  |                                             |
| H1045                   | 14-08-11                  | M         | N              | 2                                    | N                     | N                                  |                                             |
| H1058                   | 14-08-11                  | M         | Y              | 3                                    | Y                     | N                                  |                                             |
| H1066                   | 16-08-11                  | F         | Y              | 2                                    | Y                     | N                                  |                                             |
| H1067                   | 16-08-11                  | F         | Y              | 1                                    | N                     | N                                  |                                             |
| H1095                   | 17-08-11                  | F         | N              | 3                                    | N                     | N                                  |                                             |
| H1102                   | 18-08-11                  | F         | Y              | 1                                    | Y                     | N                                  |                                             |
| H1120.1                 | 19-08-11                  | M         | N              | 3                                    | N                     | N                                  |                                             |
| H1120.2                 | 19-08-11                  | F         | N              | 3                                    | N                     | N                                  |                                             |
| H1160                   | 23-08-11                  | M         | N              | 3                                    | Y                     | N                                  |                                             |
| H1170                   | 24-08-11                  | M         | Y              | 1                                    | Y                     | N                                  |                                             |
| H1171                   | 24-08-11                  | F         | Y              | 3                                    | Y                     | N                                  |                                             |
| H1179                   | 24-08-11                  | M         | Y              | 3                                    | Y                     | N                                  |                                             |
| H1181                   | 24-08-11                  | M         | N              | 3                                    | N                     | N                                  |                                             |
| H1191                   | 25-08-11                  | F         | Y              | 3                                    | Y                     | N                                  |                                             |
| H121                    | 16-05-11                  | M         | Y              | 1                                    | Y                     | N                                  |                                             |
| H1214                   | 28-08-11                  | F         | Y              | 1                                    | Y                     | N                                  |                                             |
| H122                    | 17-05-11                  | M         | Y              | 2                                    | Y                     | N                                  |                                             |
| H1280                   | 07-09-11                  | M         | N              | 3                                    | N                     | N                                  |                                             |
| H1282                   | 07-09-11                  | M         | N              | 3                                    | N                     | N                                  |                                             |
| H1283                   | 07-09-11                  | M         | N              | na                                   | N                     | N                                  |                                             |
| H1287                   | 08-09-11                  | M         | N              | 3                                    | N                     | N                                  |                                             |
| H1288                   | 08-09-11                  | F         | N              | 3                                    | Y                     | N                                  |                                             |
| H1322                   | 12-09-11                  | na        | N              | 1                                    | N                     | N                                  |                                             |
| H1333                   | 04-09-11                  | na        | N              | 1                                    | Y                     | Y 061 Poly cystic kidney           |                                             |
| H1406                   | 14-09-11                  | F         | N              | 3                                    | N                     | N                                  |                                             |
| H1402                   | 18-05-11                  | F         | N              | 2                                    | N                     | N                                  |                                             |
| H1418                   | 25-09-11                  | F         | N              | 1                                    | N                     | N                                  |                                             |
| H147                    | 12-06-11                  | F         | N              | 3                                    | Y                     | N                                  |                                             |
| H164                    | 21-05-11                  | M         | Y              | 3                                    | Y                     | N                                  |                                             |
| H167                    | 21-05-11                  | M         | Y              | 3                                    | 1 x Y                 | N                                  |                                             |
| H191                    | 23-05-11                  | F         | Y              | 1                                    | Y                     | N                                  |                                             |
| H194                    | 23-05-11                  | F         | Y              | 3                                    | Y                     | N                                  |                                             |
| H249                    | 27-05-11                  | F         | Y              | 1                                    | Y                     | N                                  |                                             |
| H241                    | 27-05-11                  | F         | Y              | 1                                    | Y                     | N                                  |                                             |
| H260                    | 28-05-11                  | F         | Y              | 3                                    | Y                     | N                                  |                                             |
| H268                    | 30-05-11                  | M         | Y              | na                                   | na                    | N                                  |                                             |
| H275                    | 03-08-11                  | F         | Y              | 1                                    | Y                     | N                                  |                                             |
| H286.1                  | 07-07-11                  | F         | N              | 3                                    | N                     | N                                  |                                             |
| H283                    | 18-07-11                  | M         | N              | 1                                    | N                     | N                                  |                                             |
| H294                    | 01-08-11                  | F         | Y              | 3                                    | Y                     | N                                  |                                             |
| H2910                   | 01-08-11                  | M         | Y              | 1                                    | Y                     | N                                  |                                             |
| H297                    | 03-08-11                  | F         | Y              | 1                                    | N                     | N                                  |                                             |
| H29                     | 14-05-11                  | M         | Y              | 1                                    | Y                     | N                                  |                                             |
| H233                    | 10-08-11                  | F         | N              | 3                                    | N                     | N                                  |                                             |
| K397                    | 08-06-11                  | N         | 3              | N                                    | N                     | N                                  |                                             |
| K418                    | 10-06-11                  | M         | N              | 3                                    | N                     | N                                  |                                             |
| K407                    | 09-07-11                  | F         | N              | 2                                    | N                     | N                                  |                                             |
| K414                    | 03-07-11                  | M         | N              | 1                                    | N                     | N                                  |                                             |
| K452                    | 08-07-11                  | F         | N              | 3                                    | Y                     | OT4.2 lower limbs + Abdominal wall |                                             |
| K462                    | 10-07-11                  | F         | N              | 3                                    | N                     | N                                  |                                             |
| K738                    | 22-07-11                  | M         | N              | 1                                    | N                     | N                                  |                                             |
| K739                    | 22-07-11                  | M         | N              | 1                                    | N                     | N                                  |                                             |
| K762                    | 30-07-11                  | M         | N              | 1                                    | N                     | N                                  |                                             |
| M116                    | 15-08-11                  | M         | N              | 3                                    | N                     | N                                  |                                             |
| M169                    | 20-08-11                  | M         | N              | 3                                    | N                     | N                                  |                                             |
| M213                    | 23-08-11                  | na        | N              | 3                                    | N                     | N                                  |                                             |
| M247                    | 27-08-11                  | F         | N              | 3                                    | N                     | N                                  |                                             |
| M251                    | 27-08-11                  | F         | N              | 3                                    | N                     | N                                  |                                             |
| M283                    | 02-09-11                  | M         | N              | 1                                    | N                     | N                                  |                                             |
| M318                    | 06-09-11                  | M         | N              | 3                                    | N                     | N                                  |                                             |
| M328                    | 06-09-11                  | M         | N              | 2                                    | N                     | N                                  |                                             |
| M345                    | 08-09-11                  | M         | N              | 3                                    | N                     | N                                  |                                             |
| M346                    | 08-09-11                  | M         | N              | 3                                    | N                     | N                                  |                                             |
| M406                    | 14-09-11                  | M         | N              | 3                                    | N                     | N                                  |                                             |
| M445                    | 19-09-11                  | M         | N              | 3                                    | N                     | N                                  |                                             |
| E459                    | 20-06-11                  | F         | Y              | 2                                    | Y                     | N                                  | 091.3 Edward syndrome                       |
| E491                    | 22-06-11                  | M         | Y              | 1                                    | Y                     | N                                  | 037 Cleft palate with cleft lip             |
| H170                    | 22-05-11                  | F         | Y              | 2                                    | Y                     | N                                  | 039.8 Atresia of oesophagus without fistula |
| TOTAL 94                | 48M/43F, 31 Y, 63N<br>3na |           |                | 34 1'd, 8 2'-3' d, 47unrelated, 5 na | 39Y, 53 N, 2na        | 3Y/91N                             | 3Y/91N                                      |

## PREMATURES past 28 weeks

| Interviewer file number | date of birth | child sex | alive at birth | parents relationship | previous miscarriages | previous BD                   | BD |
|-------------------------|---------------|-----------|----------------|----------------------|-----------------------|-------------------------------|----|
| E380                    | 18-09-11      | M         | N              | 3                    | N                     | N                             |    |
| E443                    | 24-09-11      | F         | Y              | 3                    | N                     | N                             |    |
| E456                    | 26-09-11      | F         | Y              | 3                    | N                     | N                             |    |
| E507                    | 03-10-11      | M         | Y              | 3                    | N                     | N                             |    |
| H677.1P*                | 03-07-11      | F         | Y              | 3                    | N                     | N                             |    |
| H677.2P*                | 03-07-11      | M         | Y              | 3                    | N                     | N                             |    |
| H2904                   | 01-08-11      | F         | Y              | 3                    | Y                     | N                             |    |
| H1098.1P*               | 18-08-11      | F         | Y              | 1                    | N                     | N                             |    |
| H1098.2P*               | 18-08-11      | F         | Y              | 1                    | N                     | N                             |    |
| M1                      | 06-08-11      | M         | Y              | 3                    | N                     | N                             |    |
| M12                     | 09-08-11      | M         | Y              | 3                    | N                     | N                             |    |
| M179                    | 13-08-11      | M         | Y              | 2                    | N                     | N                             |    |
| M147                    | 18-08-11      | F         | Y              | 3                    | N                     | N                             |    |
| M159                    | 18-08-11      | M         | Y              | 3                    | N                     | N                             |    |
| M168                    | 20-08-11      | M         | Y              | 3                    | N                     | N                             |    |
| M235                    | 25-08-11      | M         | Y              | 3                    | N                     | N                             |    |
| M236                    | 25-08-11      | M         | Y              | 2                    | N                     | N                             |    |
| M279                    | 04-09-11      | F         | Y              | 2                    | N                     | N                             |    |
| M284                    | 04-09-11      | F         | Y              | 2                    | N                     | N                             |    |
| M285                    | 04-09-11      | F         | Y              | 3                    | N                     | N                             |    |
| M296                    | 05-09-11      | F         | Y              | 3                    | N                     | N                             |    |
| M309                    | 05-09-11      | F         | Y              | 3                    | N                     | N                             |    |
| M304                    | 06-09-11      | F         | Y              | 2                    | N                     | N                             |    |
| M317                    | 06-09-11      | F         | Y              | 3                    | N                     | N                             |    |
| M338                    | 07-09-11      | F         | Y              | 3                    | N                     | N                             |    |
| M359                    | 10-09-11      | M         | Y              | 2                    | N                     | Y, 020, CHD, 3v arm           |    |
| M453                    | 10-09-11      | M         | Y              | 3                    | N                     | Y, BD not described, 15 v arm |    |
| M171                    | 12-09-11      | F         | Y              | 3                    | N                     | N                             |    |
| M376                    | 12-09-11      | F         | Y              | 2                    | N                     | N                             |    |
| M380                    | 12-09-11      | F         | Y              | 1                    | N                     | N                             |    |
| M387.1*                 | 12-09-11      | F         | Y              | 2                    | Y                     | N                             |    |
| M387.2*                 | 12-09-11      | F         | Y              | 2                    | Y                     | N                             |    |
| M397                    | 14-09-11      | F         | Y              | 3                    | N                     | N                             |    |
| M420                    | 17-09-11      | M         | Y              | 1                    | N                     | N                             |    |
| M439                    | 19-09-11      | F         | Y              | 3                    | N                     | N                             |    |
| M449                    | 19-09-11      | M         | Y              | 2                    | N                     | N                             |    |
| M441                    | 19-09-11      | M         | Y              | 3                    | N                     | N                             |    |
| M448                    | 20-09-11      | F         | Y              | 3                    | N                     | N                             |    |
| M450                    | 20-09-11      | F         | Y              | 3                    | N                     | N                             |    |
| M453                    | 21-09-11      | F         | Y              | 3                    | N                     | N                             |    |
| M478                    | 25-09-11      | M         | Y              | 3                    | N                     | N                             |    |
| M481                    | 26-09-11      | F         | Y              | 3                    | N                     | N                             |    |
| M503                    | 04-10-11      | M         | Y              | 3                    | N                     | N                             |    |

|                                |          |         |        |                  |        |          |                               |
|--------------------------------|----------|---------|--------|------------------|--------|----------|-------------------------------|
| M504                           | 04-10-11 | M       | V      | 3                | N      | N        |                               |
| H196                           | 24-05-11 | F       | V      | 3                | N      | N        | O39.0 Atresia of osseous part |
| H247                           | 06-08-11 | F       | N      | 3                | N      | N        | O28.7 multiple                |
| E275                           | 07-05-11 | ma      | N      | 1                | N      | N        | O25.2 skull and face bones    |
| TOTAL 47 (3 couples of twins*) |          |         |        |                  |        |          |                               |
|                                |          | 19M/28F | 45V/2N | 6 1°d,12 2°-3°d, | 5V/42N | 2 V/45 N | 3V/42N                        |
|                                |          | 1ma     |        | 29 unrelated     |        |          |                               |

N.B. registration of prematures was carried on only for 3 months

STILL BORN at term

| interviewer file number | date of birth | child sex | parents relationship | previous miscarriages | previous BD      | BD                                         |
|-------------------------|---------------|-----------|----------------------|-----------------------|------------------|--------------------------------------------|
| E1                      | 04-08-11      | F         | 3                    | N                     | N, not described | N                                          |
| E111                    | 17-08-11      | F         | 3                    | N                     | N                | N                                          |
| E262                    | 06-09-11      | F         | 3                    | N                     | N                | N                                          |
| E34                     | 07-08-11      | F         | 3                    | N                     | N                | N                                          |
| E392                    | 20-09-11      | F         | 3                    | N                     | N                | N                                          |
| E62                     | 11-08-11      | F         | 1                    | N                     | N                | N                                          |
| E109                    | 19-05-11      | M         | 3                    | ma                    | N                | N                                          |
| F171                    | 20-05-11      | M         | 3                    | ma                    | N                | N                                          |
| E31                     | 12-05-11      | F         | 3                    | ma                    | N                | N                                          |
| H103                    | 14-05-11      | M         | 3                    | N                     | N                | N                                          |
| H1057                   | 15-08-11      | M         | 3                    | N                     | N                | N                                          |
| H1118                   | 28-08-11      | F         | 1                    | N                     | N                | N                                          |
| H125                    | 17-05-11      | F         | 2                    | ma                    | N                | N                                          |
| H1289                   | 08-09-11      | M         | 1                    | N                     | N                | N                                          |
| H1329                   | 14-09-11      | F         | 3                    | N                     | N                | N                                          |
| H162                    | 21-05-11      | F         | 0                    | ma                    | N                | N                                          |
| H189                    | 22-05-11      | F         | 1                    | ma                    | N                | N                                          |
| H217                    | 26-05-11      | F         | 3                    | ma                    | N                | N                                          |
| H275                    | 30-05-11      | M         | 3                    | V, 4 times            | N                | N                                          |
| H385                    | 07-06-11      | M         | 1                    | N                     | N                | N                                          |
| H648                    | 30-06-11      | M         | 3                    | N                     | N                | N                                          |
| H96                     | 15-05-11      | M         | 0                    | ma                    | N                | N                                          |
| M13                     | 06-08-11      | M         | 1                    | N                     | N                | N                                          |
| M187                    | 22-08-11      | F         | 3                    | N                     | N                | N                                          |
| M190                    | 23-08-11      | M         | 1                    | N                     | N                | N                                          |
| M179                    | 12-09-11      | F         | 3                    | N                     | N                | N                                          |
| M380                    | 12-09-11      | F         | 1                    | N                     | N                | N                                          |
| M71                     | 11-08-11      | M         | 3                    | N                     | N                | N                                          |
| E26                     | 15-08-11      | M         | 3                    | N                     | N                | O25.0 skull and face bones + autistic+LUPP |
| H1045                   | 14-08-11      | M         | 2                    | N                     | N                | O28.7 multiples+SR                         |
| TOTAL 30                |               |           |                      |                       |                  |                                            |
|                         |               | 14M/16F   | 9 1°d, 2 2°and 3° d, | 20N/2V/8ma            | 1V/29N           | 2V/28N                                     |
|                         |               |           | 17 not related, 2 ms |                       |                  |                                            |
