# Supplementary material for: Birth Defects in Gaza: Prevalence, Types, Familiarity and Correlation with Environmental Factors
Source: MDPI journal article supplement (doi:10.3390/ijerph9051732), 2012-05-07
Supplement: s1 [file s1]

BD

|                             |
|-----------------------------|
| <b>respondants</b>          |
| residence question total 61 |
| exposure questions total 44 |
