# Supplementary material for: Birth Defects in Gaza: Prevalence, Types, Familiarity and Correlation with Environmental Factors
Source: MDPI journal article supplement (doi:10.3390/ijerph9051732), 2012-05-07
Supplement: s1 [file s1]

Supplementary Table IV-Families with newborn child and previous BD in their reproductive history

| interviewer N | newborn child | newborn diagnosis                                                        | date of birth        | parents relation     | PHD                                                          | previous late M | N sisters | N sisters children | MOTHER SIBLINGS      | N brothers | N brothers children | N brother children BD | N sisters | N sister children | FATHER SIBLINGS      | N brothers | N brothers children | N brothers children BD      |
|---------------|---------------|--------------------------------------------------------------------------|----------------------|----------------------|--------------------------------------------------------------|-----------------|-----------|--------------------|----------------------|------------|---------------------|-----------------------|-----------|-------------------|----------------------|------------|---------------------|-----------------------------|
| E148          | F             | N                                                                        | 21-08-11             | 3                    | V1 child 083, Hydrocephalus                                  | N               | 7         | 8                  | 0                    | 5          | 4                   | 0                     | 0         | 0                 | 0                    | 6          | 3                   | 0                           |
| E181          | F             | N                                                                        | 16-08-11             | 3                    | V1 child-020, CHD                                            | N               | 4         | 13                 | 0                    | 2          | 6                   | 0                     | 0         | 0                 | 0                    | 3          | 5                   | 0                           |
| E110          | M             | Q20, CHD                                                                 | 17-08-11             | 3                    | V1 child-020, CHD                                            | N               | 4         | 13                 | 0                    | 6          | 2                   | 0                     | 5         | 4                 | 0                    | 3          | 3                   | 0                           |
| E158          | F             | N                                                                        | 22-08-11             | 3                    | V1 child-021.0, CHD, vsd                                     | N               | 4         | 17                 | 0                    | 2          | 6                   | 0                     | 6         | 17                | 0                    | 3          | 5                   | 0                           |
| E244          | M             | N                                                                        | 05-09-11             | 3                    | V1 child ectromyosis                                         | N               | 7         | 15                 | 0                    | 6          | 27                  | 0                     | 10        | 20                | 0                    | 4          | 3                   | 0                           |
| E257          | M             | N                                                                        | 06-09-11             | 3                    | V1 child-021.0, CHD, vsd                                     | N               | 6         | 17                 | 0                    | 3          | 2                   | 0                     | 7         | 11                | 0                    | 5          | 3                   | 0                           |
| E286          | M             | N                                                                        | 08-09-11             | 3                    | V1 child 083, Hydrocephalus                                  | N               | 1         | 6                  | 1                    | 2          | 24                  | 0                     | 3         | 5                 | 0                    | 6          | 41                  | 2                           |
| E312          | F             | N                                                                        | 12-09-11             | 3                    | V1 child 073, congenital malformations of lower limbs        | N               | 9         | 22                 | 1                    | 5          | 0                   | 0                     | 4         | 1                 | 0                    | 5          | 5                   | 0                           |
| E320          | F             | N                                                                        | 13-09-11             | 3                    | V1 child-021.0, CHD, vsd                                     | N               | 7         | 15                 | 0                    | 6          | 27                  | 0                     | 10        | 20                | 0                    | 4          | 3                   | 0                           |
| E332          | M             | N                                                                        | 14-09-11             | 3                    | V1 child 065.0, Congenital hip dislocation                   | N               | 2         | 18                 | 2                    | 5          | 24                  | 0                     | 3         | 18                | 0                    | 5          | 15                  | 2                           |
| E4            | M             | N                                                                        | 04-08-11             | 3                    | V1 child Limbomelia                                          | N               | 2         | 2                  | 2                    | 2          | 2                   | 0                     | 2         | 2                 | 0                    | 2          | 2                   | 0                           |
| E409          | F             | N                                                                        | 21-09-11             | 3                    | V1 child 084.2, Cerebral Palsy                               | N               | 3         | 24                 | 0                    | 2          | 11                  | 0                     | 7         | 25                | 0                    | 3          | 6                   | 0                           |
| E447          | F             | N                                                                        | 25-09-11             | 3                    | V1 child 020 Down syndrome                                   | N               | 2         | 0                  | 0                    | 7          | 15                  | 3                     | 5         | 8                 | 0                    | 4          | 11                  | 0                           |
| E185          | M             | N                                                                        | 19-05-11             | 3                    | V1 child 092, Cerebral atrophy                               | N               | 2         | 0                  | 0                    | 2          | 2                   | 0                     | 2         | 2                 | 0                    | 2          | 2                   | 0                           |
| E147          | F             | N                                                                        | 12-05-11             | 2                    | V1 child 083, Hydrocephalus                                  | N               | 2         | 0                  | 0                    | 2          | 2                   | 0                     | 2         | 2                 | 0                    | 2          | 2                   | 0                           |
| E156          | F             | N                                                                        | 25-05-11             | 1                    | V1 child 08 Anencephaly                                      | N               | 2         | 0                  | 0                    | 2          | 2                   | 0                     | 2         | 2                 | 0                    | 2          | 2                   | 0                           |
| E251          | M             | N                                                                        | 06-06-11             | 1                    | V1 child-020, CHD                                            | N               | 2         | 0                  | 0                    | 4          | 0                   | 0                     | 2         | 0                 | 0                    | 6          | 2                   | 0                           |
| E413          | M             | N                                                                        | 18-06-11             | 1                    | V1 child 084.3, Cerebral Palsy                               | N               | 2         | 0                  | 0                    | 4          | 0                   | 0                     | 2         | 16                | 0                    | 4          | 4                   | 0                           |
| E48           | M             | N                                                                        | 13-05-11             | 3                    | V1 child E84 (ICD10), Cystic Fibrosis                        | N               | 6         | 18                 | 0                    | 4          | 0                   | 0                     | 13        | 40                | 0                    | 21         | 100                 | 0                           |
| E55           | F             | N                                                                        | 13-05-11             | 1                    | V1 child Q13.3, Congenital corneal opacity                   | N               | 2         | 0                  | 0                    | 2          | 2                   | 0                     | 2         | 2                 | 0                    | 2          | 2                   | 0                           |
| E584          | M             | N                                                                        | 10-07-11             | 3                    | V1 child 061.3, Polycystic kidneys, unspecified              | N               | 5         | 16                 | 0                    | 5          | 14                  | 0                     | 5         | 19                | 0                    | 3          | 0                   | 0                           |
| E65           | F             | N                                                                        | 14-05-11             | 3                    | V1 child 065.3, Congenital hip dislocation                   | N               | 2         | 0                  | 0                    | 2          | 2                   | 0                     | 2         | 2                 | 0                    | 2          | 2                   | 0                           |
| E68           | M             | N                                                                        | 14-05-11             | 3                    | V1 child Limbomelia                                          | N               | 2         | 0                  | 0                    | 2          | 2                   | 0                     | 2         | 2                 | 0                    | 2          | 2                   | 0                           |
| H1844         | M             | N                                                                        | 15-08-11             | 2                    | V1 child Mental retardation                                  | N               | 2         | 4                  | 2                    | 0          | 0                   | 0                     | 4         | 20                | 0                    | 3          | 2                   | 0                           |
| H1849         | M             | N                                                                        | 15-08-11             | 3                    | V1 child 079.2, Abdominal wall defect                        | N               | 6         | 30                 | 0                    | 2          | 0                   | 0                     | 5         | 20                | 0                    | 3          | 0                   | 0                           |
| H1864         | F             | N                                                                        | 16-08-11             | 1                    | V1 child 029.2, Atrialia of neonathus without fistula        | N               | 3         | 6                  | 0                    | 3          | 0                   | 0                     | 5         | 5                 | 0                    | 2          | 2                   | 0                           |
| H1116         | F             | N                                                                        | 13-08-11             | 1                    | V1 child Limbomelia                                          | N               | 2         | 0                  | 0                    | 2          | 2                   | 0                     | 2         | 2                 | 0                    | 2          | 2                   | 0                           |
| H1161         | F             | N                                                                        | 23-08-11             | 3                    | V1 child Limbomelia                                          | N               | 2         | 1                  | 0                    | 3          | 1                   | 0                     | 2         | 6                 | 1                    | 4          | 18                  | 0                           |
| H1172         | F             | N                                                                        | 24-08-11             | 1                    | V1 child Limbomelia                                          | N               | 3         | 1                  | 0                    | 4          | 0                   | 0                     | 4         | 15                | 0                    | 2          | 1                   | 0                           |
| H1291         | F             | N                                                                        | 08-09-11             | 1                    | V1 child 020, CHD                                            | N               | 2         | 35                 | 0                    | 2          | 11                  | 0                     | 5         | 20                | 0                    | 8          | 20                  | 0                           |
| H1333         | F             | N                                                                        | 04-09-11             | 1                    | V1 child 061.3, Polycystic kidneys, unspecified              | N               | 5         | 16                 | 0                    | 5          | 14                  | 0                     | 5         | 19                | 0                    | 3          | 0                   | 0                           |
| H141          | M             | N                                                                        | 18-05-11             | 1                    | V1 child delivery (cerebral haemorrhage)                     | N               | 2         | 0                  | 0                    | 2          | 0                   | 0                     | 2         | 15                | 0                    | 1          | 5                   | 0                           |
| H1414         | F             | N                                                                        | 24-09-11             | 3                    | V1 child 083, Hydrocephalus                                  | N               | 9         | 35                 | 0                    | 3          | 7                   | 1                     | 3         | 19                | 0                    | 6          | 13                  | 0                           |
| H1470         | M             | N                                                                        | 01-10-11             | 3                    | V1 child 028.2, multiple                                     | N               | 6         | 2                  | 1                    | 9          | 7                   | 0                     | 6         | 20                | 0                    | 4          | 8                   | 0                           |
| H1496         | F             | N                                                                        | 04-10-11             | 3                    | V1 child 061.3, Polycystic kidneys, unspecified              | N               | 5         | 1                  | 0                    | 7          | 5                   | 0                     | 7         | 15                | 0                    | 4          | 6                   | 0                           |
| H211          | M             | N                                                                        | 24-05-11             | 3                    | V1 child 061.3, Polycystic kidneys, unspecified              | N               | 3         | 3                  | 0                    | 3          | 2                   | 0                     | 4         | 10                | 0                    | 6          | 15                  | 0                           |
| H212          | M             | N                                                                        | 24-05-11             | 3                    | V1 child 083, Hydrocephalus                                  | N               | 2         | 0                  | 0                    | 8          | 12                  | 0                     | 2         | 16                | 0                    | 6          | 20                  | 0                           |
| H249          | M             | N                                                                        | 28-05-11             | 3                    | V1 child Limbomelia                                          | N               | 5         | 25                 | 0                    | 4          | 25                  | 0                     | 4         | 20                | 0                    | 8          | 50                  | 0                           |
| H276          | M             | N                                                                        | 20-05-11             | 3                    | V1 child-020, CHD                                            | N               | 2         | 10                 | 1                    | 4          | 20                  | 0                     | 3         | 18                | 0                    | 5          | 12                  | 1                           |
| H277          | F             | N                                                                        | 20-05-11             | 3                    | V1 child Limbomelia                                          | N               | 5         | 20                 | 0                    | 4          | 20                  | 0                     | 4         | 11                | 0                    | 6          | 20                  | 1                           |
| H279          | F             | N                                                                        | 20-05-11             | 1                    | V1 child 065.3, Congenital hip dislocation                   | N               | 1         | 2                  | 0                    | 3          | 0                   | 0                     | 4         | 5                 | 0                    | 8          | 12                  | 1                           |
| H368.1        | M             | N                                                                        | 07-06-11             | 3                    | V1 child Limbomelia                                          | N               | 5         | 20                 | 0                    | 4          | 10                  | 1                     | 5         | 27                | 0                    | 4          | 30                  | 1                           |
| H426.1        | M             | N                                                                        | 12-06-11             | 3                    | V1 child Limbomelia                                          | N               | 4         | 10                 | 0                    | 3          | 3                   | 0                     | 7         | 40                | 0                    | 4          | 50                  | 0                           |
| H431          | F             | N                                                                        | 12-06-11             | 1                    | V1 child 083, Hydrocephalus                                  | N               | 5         | 10                 | 0                    | 5          | 0                   | 0                     | 7         | 15                | 0                    | 4          | 6                   | 0                           |
| H449          | F             | N                                                                        | 14-06-11             | 1                    | V1 child 028.2, multiple                                     | N               | 5         | 1                  | 0                    | 6          | 2                   | 0                     | 7         | 41                | 1                    | 3          | 7                   | 0                           |
| H479          | M             | N                                                                        | 15-06-11             | 1                    | V1 child Limbomelia                                          | N               | 4         | 11                 | 0                    | 3          | 8                   | 3                     | 2         | 0                 | 0                    | 2          | 2                   | 0                           |
| H535          | F             | N                                                                        | 20-06-11             | 3                    | V1 child 083, Hydrocephalus                                  | N               | 10        | 6                  | 1                    | 2          | 1                   | 0                     | 3         | 25                | 0                    | 4          | 20                  | 0                           |
| H554          | F             | N                                                                        | 21-06-11             | 3                    | V1 child-020, CHD                                            | N               | 4         | 6                  | 0                    | 4          | 16                  | 0                     | 4         | 20                | 0                    | 4          | 25                  | 0                           |
| H597          | M             | N                                                                        | 23-06-11             | 3                    | V1 child 084.3, Cerebral Palsy                               | N               | 0         | 0                  | 0                    | 6          | 0                   | 0                     | 6         | 0                 | 0                    | 3          | 3                   | 0                           |
| H628          | F             | 083,hydrocephalus                                                        | 27-06-11             | 3                    | V1 child 083, Hydrocephalus                                  | N               | 2         | 11                 | 0                    | 5          | 25                  | 0                     | 6         | 41                | 0                    | 4          | 25                  | 0                           |
| H637          | F             | N                                                                        | 27-06-11             | 3                    | V1 child 083, Hydrocephalus                                  | N               | 8         | 18                 | 0                    | 6          | 6                   | 0                     | 4         | 14                | 0                    | 3          | 6                   | 0                           |
| H672          | F             | 075.9 Facial bones anomaly                                               | 02-07-11             | 1                    | V1 child 084.2, Cerebral Palsy                               | N               | 8         | 0                  | 0                    | 2          | 0                   | 0                     | 3         | 1                 | 0                    | 4          | 1                   | 0                           |
| H689          | F             | N                                                                        | 27-06-11             | 3                    | V1 child 079.8, Congenital diaphragmatic hernia              | N               | 0         | 0                  | 0                    | 0          | 0                   | 0                     | 3         | 12                | 0                    | 1          | 6                   | 1                           |
| H849          | F             | N                                                                        | 26-07-11             | 2                    | V1 child-020, CHD                                            | N               | 8         | 17                 | 0                    | 6          | 9                   | 1                     | 4         | 9                 | 0                    | 5          | 0                   | 0                           |
| H859          | M             | N                                                                        | 27-07-11             | 1                    | V1 child 082.2, Congenital malformation of skin, unspecified | N               | 5         | 5                  | 0                    | 3          | 7                   | 0                     | 4         | 12                | 0                    | 6          | 7                   | 0                           |
| H939          | M             | N                                                                        | 03-08-11             | 1                    | V1 child Limbomelia                                          | N               | 5         | 10                 | 0                    | 6          | 6                   | 0                     | 4         | 5                 | 0                    | 4          | 2                   | 0                           |
| H949          | F             | N                                                                        | 06-08-11             | 1                    | V1 child-020, CHD                                            | N               | 5         | 11                 | 2                    | 3          | 8                   | 0                     | 3         | 5                 | 0                    | 1          | 6                   | 0                           |
| H973          | F             | N                                                                        | 07-08-11             | 3                    | V1 child 060, Renal agenesis                                 | N               | 1         | 12                 | 0                    | 4          | 6                   | 0                     | 5         | 0                 | 0                    | 4          | 0                   | 0                           |
| M165          | F             | N                                                                        | 20-08-11             | 1                    | V1 child Limbomelia                                          | N               | 2         | 0                  | 0                    | 2          | 2                   | 0                     | 2         | 2                 | 0                    | 2          | 2                   | 0                           |
| M204          | M             | N                                                                        | 22-08-11             | 3                    | V1 child Limbomelia                                          | N               | 2         | 0                  | 0                    | 2          | 2                   | 0                     | 2         | 2                 | 0                    | 2          | 2                   | 0                           |
| M239          | F             | N                                                                        | 25-08-11             | 1                    | V1 child Limbomelia                                          | N               | 2         | 0                  | 0                    | 2          | 2                   | 0                     | 2         | 2                 | 0                    | 2          | 2                   | 0                           |
| M340          | F             | N                                                                        | 07-09-11             | 2                    | V1 child 028.2, multiple                                     | N               | 2         | 0                  | 0                    | 2          | 2                   | 0                     | 2         | 2                 | 0                    | 2          | 2                   | 0                           |
| M350P         | M             | N                                                                        | 10-09-11             | 2                    | V1 child-020, CHD                                            | N               | 2         | 0                  | 0                    | 2          | 2                   | 0                     | 2         | 2                 | 0                    | 2          | 2                   | 0                           |
| M353P         | M             | N                                                                        | 10-09-11             | 3                    | V1 child Limbomelia                                          | N               | 2         | 0                  | 0                    | 2          | 2                   | 0                     | 2         | 2                 | 0                    | 2          | 2                   | 0                           |
| M365          | F             | N                                                                        | 11-09-11             | 2                    | V1 child Limbomelia                                          | N               | 2         | 0                  | 0                    | 2          | 2                   | 0                     | 2         | 2                 | 0                    | 2          | 2                   | 0                           |
| M386          | M             | N                                                                        | 04-09-11             | 3                    | V1 child Limbomelia                                          | N               | 2         | 0                  | 0                    | 2          | 2                   | 0                     | 2         | 2                 | 0                    | 2          | 2                   | 0                           |
| M389          | F             | N                                                                        | 12-09-11             | 1                    | V1 child Limbomelia                                          | N               | 2         | 0                  | 0                    | 2          | 2                   | 0                     | 2         | 2                 | 0                    | 2          | 2                   | 0                           |
| M392          | M             | N                                                                        | 13-09-11             | 2                    | V1 child 021.0, Dextrocardia vsd                             | N               | 2         | 0                  | 0                    | 2          | 2                   | 0                     | 2         | 2                 | 0                    | 2          | 2                   | 0                           |
| M416          | M             | N                                                                        | 17-09-11             | 2                    | V1 child-020, CHD                                            | N               | 2         | 0                  | 0                    | 2          | 2                   | 0                     | 2         | 2                 | 0                    | 2          | 2                   | 0                           |
| M424          | M             | N                                                                        | 17-09-11             | 1                    | V1 child-020, CHD                                            | N               | 2         | 0                  | 0                    | 2          | 2                   | 0                     | 2         | 2                 | 0                    | 2          | 2                   | 0                           |
| M499P         | M             | N                                                                        | 04-10-11             | 1                    | V1 child Limbomelia                                          | N               | 2         | 0                  | 0                    | 2          | 2                   | 0                     | 2         | 2                 | 0                    | 2          | 2                   | 0                           |
| M51           | M             | N                                                                        | 10-08-11             | 3                    | V1 child Limbomelia                                          | N               | 2         | 0                  | 0                    | 2          | 2                   | 0                     | 2         | 2                 | 0                    | 2          | 2                   | 0                           |
| M56           | F             | N                                                                        | 10-08-11             | 3                    | V1 child Limbomelia                                          | N               | 2         | 0                  | 0                    | 2          | 2                   | 0                     | 2         | 2                 | 0                    | 2          | 2                   | 0                           |
| E249          | F             | 084 Microcephaly + IUGR                                                  | 02-09-11             | 1                    | V1 child 084.3, 1 child 082                                  | N               | 4         | 17                 | 0                    | 4          | 8                   | 0                     | 5         | 18                | 0                    | 5          | 22                  | 0                           |
| E465          | M             | 084 Hydrocephalus                                                        | 27-09-11             | 1                    | V1 child 061.1                                               | N               | 2         | 0                  | 0                    | 2          | 2                   | 0                     | 2         | 2                 | 0                    | 2          | 2                   | 0                           |
| H247          | M             | 080.0 Anencephaly                                                        | 28-05-11             | 1                    | V1 child 020                                                 | N               | 6         | 14                 | 0                    | 5          | 8                   | 0                     | 3         | 12                | 0                    | 7          | 50                  | 0                           |
| H262          | F             | 075.9 Facial bones anomaly                                               | 14-07-11             | 2                    | V1 child 083                                                 | N               | 2         | 25                 | 0                    | 4          | 10                  | 0                     | 6         | 16                | 0                    | 5          | 7                   | 0                           |
| H247          | M             | 080.0 Anencephaly                                                        | 28-05-11             | 1                    | V1 child 020, CHD, IUGR, 1 child 084.3                       | N               | 6         | 14                 | 0                    | 5          | 8                   | 0                     | 3         | 12                | 0                    | 7          | 50                  | 0                           |
| H628          | F             | 083,hydrocephalus                                                        | 27-06-11             | 3                    | V1 child 083, Hydrocephalus                                  | N               | 5         | 25                 | 0                    | 6          | 16                  | 0                     | 4         | 16                | 0                    | 4          | 25                  | 0                           |
| H262          | F             | 075.9 Facial bones anomaly                                               | 14-07-11             | 2                    | V1 child 083, Hydrocephalus                                  | N               | 2         | 25                 | 0                    | 4          | 10                  | 0                     | 6         | 16                | 0                    | 5          | 7                   | 0                           |
| H779          | M             | 037 Cleft palate with cleft lip                                          | 16-07-11             | 3                    | V1 child 083, Hydrocephalus                                  | N               | 2         | 10                 | 1                    | 5          | 20                  | 0                     | 2         | 0                 | 0                    | 5          | 10                  | 1 child 084.3 brain atrophy |
| H797          | F             | 080.9 Congenital hydrocephalus, unspecified + brain atrophy, unresurated | 20-07-11             | 3                    | V1 children brain atrophy, hydrocephalus 083                 | N               | 2         | 9                  | 0                    | 2          | 7                   | 0                     | 3         | 20                | 0                    | 4          | 20                  | 0                           |
| Total 82      | 41M/41F       | 12 BD/72 Normal                                                          | 32 1°- 10 2°-39-unc. | 32 1°- 10 2°-39-unc. | 99/73N                                                       | 248             | 720       | 12                 | 232                  | 524        | 9                   | 247                   | 844       | 4                 | 258                  | 849        | 10                  |                             |
| Number        | sex ratio     | Bd versus normal (N)                                                     | date of birth        | parents relation     | previous BD classification                                   | previous M      | N sisters | N sisters children | N sister children BD | N brothers | N brothers children | N brother children BD | N sisters | N sister children | N sister children BD | N brothers | N brothers children | N brothers children BD      |
