# Supplementary material for: Birth Defects in Gaza: Prevalence, Types, Familiarity and Correlation with Environmental Factors
Source: MDPI journal article supplement (doi:10.3390/ijerph9051732), 2012-05-07
Supplement: s1 [file s1]

| Interviewer N     | BD classification*                                                                        | child sex | child n | parents | previous late M | previous BD/ year                                           | N sisters | N sister children | N sister children BD                  | N brothers | N brothers children | N brother children BD | N sisters | N sister children | N sisters children BD       | N brothers | N brothers children | N brothers children BD                       |
|-------------------|-------------------------------------------------------------------------------------------|-----------|---------|---------|-----------------|-------------------------------------------------------------|-----------|-------------------|---------------------------------------|------------|---------------------|-----------------------|-----------|-------------------|-----------------------------|------------|---------------------|----------------------------------------------|
| BD+PBD            |                                                                                           |           |         |         |                 |                                                             |           |                   |                                       |            |                     |                       |           |                   |                             |            |                     |                                              |
| I110              | O20 CHD                                                                                   | M         | 5       | na      | N               | V 1 child O20 CHD                                           | 4         | 14                | 0                                     | 0          | 2                   | 0                     | 5         | 4                 | 0                           | 5          | 1                   | 0                                            |
| I129              | O02 Microcephaly + H/GIR                                                                  | F         | 8       | N       | N               | V 1 child O02 Microcephaly                                  | 4         | 17                | 0                                     | 4          | 2                   | 0                     | 5         | 18                | 0                           | 5          | 22                  | 0                                            |
| I166              | O01 + ABD and Small bowel volvulus + meconium cyst                                        | M         | 13      | N       | N               | V 1 child O01 Hydrocephalus; O04.3 other reduction of brain | 1         | 6                 | 0                                     | 2          | 24                  | 0                     | 3         | 5                 | 0                           | 6          | 41                  | 0                                            |
| I165              | O03 Hydrocephalus                                                                         | M         | 16      | N       | N               | V 1 child O03.4 Polycystic kidneys unspecified              | na        | na                | na                                    | na         | na                  | na                    | na        | na                | na                          | na         | na                  | na                                           |
| I167              | O00.D Anencephaly                                                                         | M         | 5       | N       | N               | V 1 child O20 CHD.H/GIR and 1 child O04.3 brain reduction   | 6         | 14                | 0                                     | 5          | 0                   | 0                     | 3         | 12                | 0                           | 7          | 50                  | 0                                            |
| I1678             | O03 hydrocephalus                                                                         | F         | 9       | N       | N               | V 3 children with Hydrocephalus; O03/18,11,10v              | 2         | 11                | 0                                     | 5          | 25                  | 0                     | 6         | 41                | 0                           | 4          | 25                  | 0                                            |
| I1674             | O05.2 Facial bones anomaly                                                                | F         | 4       | N       | N               | V 2 children O04.2 Cerebral Palsy/ 3,1,5                    | 8         | 0                 | 0                                     | 4          | 0                   | 0                     | 3         | 1                 | 0                           | 4          | 1                   | 0                                            |
| I165              | O05.2 Facial bones anomaly                                                                | F         | 4       | N       | N               | V 1 child O05 Hydrocephalus                                 | 7         | 25                | 0                                     | 6          | 10                  | 0                     | 6         | 16                | 0                           | 5          | 1                   | 0                                            |
| I197              | O03.9 Congenital hydrocephalus unspecified + brain atrophy, prematurity                   | F         | 10      | N       | N               | V a children brain atrophy, hydrocephalus O03/ 18 to 10v    | 2         | 0                 | 0                                     | 2          | 7                   | 0                     | 3         | 20                | 0                           | 4          | 20                  | 0                                            |
|                   |                                                                                           |           |         |         |                 |                                                             | 34        | 95                | 1                                     | 30         | 84                  | 0                     | 34        | 117               | 0                           | 38         | 169                 |                                              |
| BD+ BD in KIN     |                                                                                           |           |         |         |                 |                                                             |           |                   |                                       |            |                     |                       |           |                   |                             |            |                     |                                              |
| I129              | O05 Spina bifida                                                                          | M         | 1       | na      | N               | N                                                           | 8         | 16                | 1 child O04.3 brain atrophy           | 5          | 16                  | 0                     | 4         | 10                | 0                           | 2          | 2                   | 0                                            |
| I1106             | O39.D Atresia of oesophagus without fistula, prematurity                                  | F         | 2       | N       | N               | N                                                           | 10        | 2                 | 0                                     | 2          | 0                   | 0                     | 8         | 20                | 0                           | 2          | 30                  | 1 child O03 Hydrocephalus                    |
| I129              | O01.3 Polycystic kidneys unspecified                                                      | F         | 6       | N       | N               | N                                                           | 1         | 7                 | 0                                     | 8          | 27                  | 0                     | 3         | 19                | 0                           | 8          | 30                  | 2 children, congenital deafness and dyslexia |
| I189              | O87.O.C1 abnormal ear & mouth shape, deformity in toes                                    | M         | 2       | N       | N               | N                                                           | 7         | 2                 | 0                                     | 5          | 0                   | 0                     | 15        | 39                | 0                           | 13         | 15                  | 2 children with O37                          |
| I125              | O78.O1 unilateral malformation of skull and face bones, anencephaly + bilateral cleftness | na        | 6       | N       | N               | N                                                           | 11        | 2                 | 0                                     | 7          | 0                   | 0                     | 7         | 15                | 1 child O01.9 Encephalocele | 8          | 11                  | 0                                            |
|                   |                                                                                           |           |         |         |                 |                                                             | 24        | 30                | 1                                     | 28         | 38                  | 0                     | 24        | 94                | 1                           | 40         | 88                  | 6                                            |
| BD+ PBD+BD in KIN |                                                                                           |           |         |         |                 |                                                             |           |                   |                                       |            |                     |                       |           |                   |                             |            |                     |                                              |
| I1779             | O17 Cleft palate with cleft lip                                                           | M         | 9       | N       | V               | V 2 children multiple anomalies/7, 8 y                      | 2         | 10                | 1 child O04.3 brain atrophy           | 2          | 20                  | 0                     | 2         | 0                 | 0                           | 5          | 10                  | 1 child O04.3 brain atrophy                  |
| I1130             | O39.D Atresia of oesophagus without fistula                                               | F         | 5       | N       | N               | N                                                           | 4         | 8                 | 4 children with anencephaly; O00.2 15 | 5          | 0                   | 0                     | 1         | 7                 | 0                           | 1          | 7                   | 1 child O04.3 other brain reduction          |
|                   |                                                                                           |           |         |         |                 |                                                             | 6         | 18                |                                       | 5          | 10                  | 25                    | 4         | 7                 | 0                           | 7          | 17                  |                                              |

| total | house  | WP      | wounded/ | rescue/clean | materials | work     | children | symptoms |
|-------|--------|---------|----------|--------------|-----------|----------|----------|----------|
| kin   | bombed | attacks | injured  | rubble       | recovery  | exposure | exposure |          |
|       | N      | N       | N        | N            | N         | N        | N        | N        |
|       | N      | N       | N        | N            | N         | N        | N        | N        |
|       | Y      | Y       | N        | Y            | N         | N        | N        | N        |
|       | Y      | Y       | N        | Y            | N         | N        | N        | N        |
|       | N      | Y       | N        | N            | N         | N        | Y        | N        |
|       | N      | N       | N        | N            | N         | N        | N        | N        |
|       | Y      | Y       | N        | Y            | N         | N        | N        | N        |
|       | Y      | Y       | N        | Y            | N         | N        | N        | N        |
|       | Y      | Y       | N        | Y            | N         | N        | N        | N        |
|       | Y      | Y       | N        | Y            | N         | N        | N        | N        |
| 602   | 4Y/4N  | 5Y/3N   | 8N       | 4Y/4N        | 1Y/7N     | 1Y/7N    | 2Y/6N    | 8N       |
|       | N      | Y       | N        | N            | N         | N        | N        | N        |
|       | N      | N       | N        | Y            | N         | N        | N        | N        |
|       | Y      | N       | N        | N            | N         | N        | N        | N        |
|       | Y      | Y       | N        | Y            | N         | N        | N        | N        |
|       | Y      | N       | N        | Y            | N         | N        | N        | N        |
|       | Y      | N       | N        | Y            | N         | N        | N        | N        |
| 390   | 3Y/2N  | 2Y/2N   | 5N       | 3Y/2N        | 1Y/4N     | 1Y/4N    | 1Y/4N    | 5N       |
| I     | N      | Y       | N        | N            | N         | N        | N        | N        |
|       | N      | Y       | N        | N            | N         | N        | N        | N        |
|       | 2N     | 1Y/1N   | 2N       | 2N           | 2N        | 2N       | 1N       | 1N       |
