# Supplementary material for: Birth Defects in Gaza: Prevalence, Types, Familiarity and Correlation with Environmental Factors
Source: MDPI journal article supplement (doi:10.3390/ijerph9051732), 2012-05-07
Supplement: s1 [file s1]

### Birth Defects in children

|  |  |  |
|--|--|--|
|  |  |  |
|  |  |  |

Legend  
 \* according to the listing as in the questionnaire used for interviews  
 ^ father sister recurrent abortions and father cousin with multiple anomalies  
 § father sister with recurrent late miscarriages
