# Supplementary material for: Birth Defects in Gaza: Prevalence, Types, Familiarity and Correlation with Environmental Factors
Source: MDPI journal article supplement (doi:10.3390/ijerph9051732), 2012-05-07
Supplement: s1 [file s1]

Supplementary Table VII

**Incidence/1000 live births**

|                      | NT       | CHD        | CL&CLP     | GI         | Genital     | Renal      | Limb     | ABD        |
|----------------------|----------|------------|------------|------------|-------------|------------|----------|------------|
| <b>GAZA-al Shifa</b> | <b>3</b> | <b>2,3</b> | <b>1,5</b> | <b>0,5</b> | <b>0,25</b> | <b>2,3</b> | <b>1</b> | <b>0,7</b> |
| Australia            | 2,5      | 1,87       | 1,72       | 0,75       | 9,2         | 0,77       | 2,6      | 1,35       |
| Canada-Alberta       | 2,3      | 1,34       | 2,2        | 0,48       | 4,9         | 0,8        | 2,9      | 0,96       |
| Canada-Brit.Col      | 2,3      | 0,95       | 1,71       | 1,36       | 7,2         | 0,02       | 1,7      | 1,27       |
| Chile                | 0,75     | 0,37       | 1          | 0,69       | 1,9         | 0,07       | 3.15     | 0,83       |
| Cuba                 | 2,3      | 0,55       | 0,67       | 0,7        | 1,27        | 0,43       | 0,37     | 1,27       |
| Czech republic       | 1,6      | 1,8        | 1,9        | 0,95       | 3,1         | 0,98       | 0,8      | 1,2        |
| Finland              | 2        | 2          | 2          | 0,9        | 0,35        | 0,98       | 0,8      | 1,2        |
| France-Paris         | 2,5      | 1,68       | 1,6        | 0,69       | 1,8         | 1,1        | 1,3      | 1,1        |
| Germany-Saxon        | 1,9      | 1,2        | 1,8        | 0,96       | 1,2         | 0,92       | 1,8      | 0,8        |
| Hungary              | 1,7      | 1,55       | 1,3        | 0,52       | 4,9         | 0,7        | 1,3      | 0,5        |
| Iran                 | 5,4      | 0,85       | 1          | 3,9        | 1,5         | 0,25       | 3,25     | 0,85       |
| Ireland              | 1,2      | 1,6        | 1,7        | 0,75       | 1           | 0,5        | 1,1      | 0,87       |
| Israel               | 0,9      | 1,2        | 0,65       | 0,75       | 3,5         | 0,15       | 0,3      | 0,6        |
| Italy-EmiliaRom.     | 1,1      | 1,4        | 1,25       | 0,56       | 1,6         | 1          | 0,9      | 0,5        |
| Japan                | 1,7      | 1,5        | 2,6        | 1,9        | 0,3         | 0,6        | 0,9      | 1,2        |
| Malta                | 2,3      | 2,8        | 3          | 3          | 0,46        | 0,35       | 1        | 1          |
| Mexico               | 2,3      | 0,2        | 1,33       | 1,1        | 0,9         | 0,36       | 1,8      | 1          |
| New Zealand          | 0,7      | 1          | 1,4        | 0,5        | 8,1         | 0,8        | 3,3      | 0,6        |
| Norway               | 2        | 1,6        | 1,9        | 0,9        | 1,5         | 0,8        | 0,7      | 1,3        |
| Russia               | 1,3      | 0,5        | 1,2        | 0,6        | 3           | 0,6        | 0,5      | 0,9        |
| S.America<br>ECLAM   | 3,6      | 0,5        | 1,9        | 0,7        | 2,6         | 0,6        | 1,2      | 1,9        |
| Ukraine              | 2,9      | 1          | 1,1        | 0,5        | 3,4         | 0,5        | 1        | 0,6        |
| USA-Atlanta          | 2        | 1,5        | 1,2        | 0,77       | 1,1         | 0,5        | 0,65     | 1,1        |

**Legend**

The data here summarized illustrate incidence only for some BD, registered in 2007, and are taken from the ICHBDSR report 2009. Data include ToP with BD, when applied.
